# Supplementary material
Source: MDPI journal article supplement (https://www.mdpi.com/2079-9292/10/3/341)
Supplement: s1 [file s1]

**Supplemental Table 1.** Demographic characteristics and functional outcome of healthy adults.

| Variables              | Healthy adults (n = 60) |
|------------------------|-------------------------|
| Age, years             | 22.5 ± 3.5              |
| Height, cm             | 164.8 ± 7.7             |
| Weight, kg             | 60.5 ± 15.1             |
| BMI, kg/m <sup>2</sup> | 22.1 ± 4.0              |
| VAS, cm                | 0.1 ± 0.4               |
| RDQ (score)            | 0.2 ± 0.9               |

BMI = body mass index; Healthy adults = healthy adults aged 18 to 34 attending school in Aichi Prefecture; VAS = visual analog scale; RDQ = Roland–Morris disability questionnaire; Data are presented as mean ± standard deviation.

**Supplemental Table 2.** Results of RMS<sub>i</sub><sup>\*</sup> and RPW<sub>i</sub> of healthy adults.

| Variable                            | Healthy adults (n = 60) |
|-------------------------------------|-------------------------|
| RMS <sub>1</sub> <sup>GS</sup> [mm] | 7.6 ± 3.6               |
| RMS <sub>1</sub> <sup>LM</sup> [mm] | 7.2 ± 3.6               |
| RPW <sub>1</sub> [%]                | 51.3 ± 14.7             |
| RMS <sub>2</sub> <sup>GS</sup> [mm] | 8.8 ± 4.0               |
| RMS <sub>2</sub> <sup>LM</sup> [mm] | 8.1 ± 3.9               |
| RPW <sub>2</sub> [%]                | 52.2 ± 14.4             |
| RMS <sub>3</sub> <sup>GS</sup> [mm] | 7.2 ± 3.7               |
| RMS <sub>3</sub> <sup>LM</sup> [mm] | 7.8 ± 4.8               |
| RPW <sub>3</sub> [%]                | 48.3 ± 13.0             |

Healthy adults = healthy adults aged 18 to 34 attending school in Aichi Prefecture; GS = gastrocnemius and soleus muscles; LM = lumbar multifidus; RMS = root mean square of the center of pressure; RPW = relative proprioceptive weighting ratio; Data are presented as mean ± standard deviation. The subscript numbers indicate the following: 1 = muscle spindles (lower frequency), from 30 to 53 Hz; 2 = muscle spindles (higher frequency), from 56 to 100 Hz; 3 = Vater-Pacini corpuscle, from 140 to 250 Hz.
